# Supplementary material
Source: PubMed Central journal article supplement (PMC4817765)

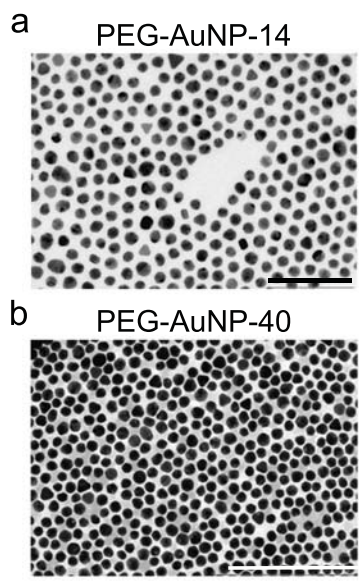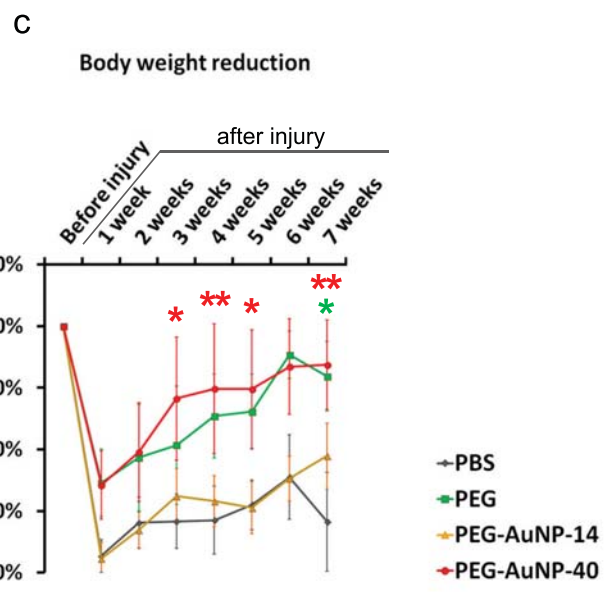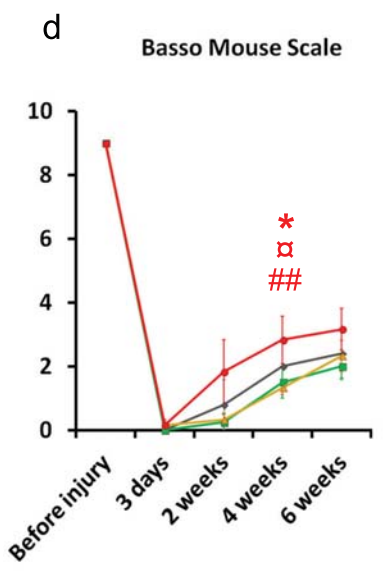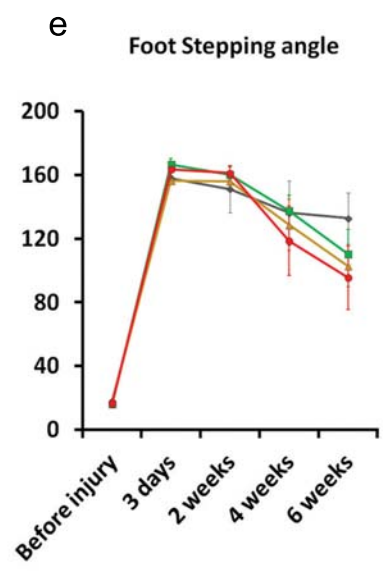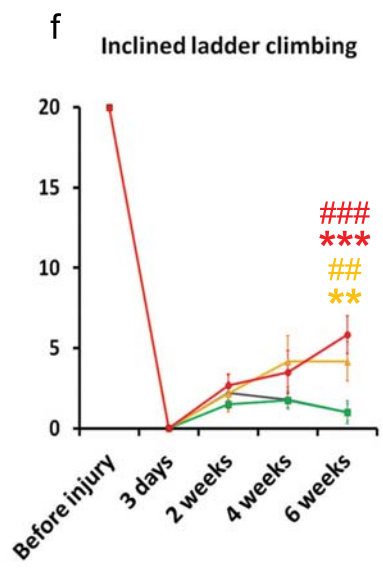

Supplement: mt201550x1.pdf [file mt201550x1.pdf]
